# Supplementary material for: Prevalence of misophonia in the general population and those with complaints of tinnitus: An epidemiological study
Source: Research Square preprint supplement (doi:10.21203/rs.3.rs-8333185/v1), 2025-12-17
Supplement: Supplementary file 1 [file 5af45ed18132498cbd1648ec.docx]

**Appendix**

Given below is the general questionnaire developed

Name: Age/ Gender:

Qualification: Education:

Email ID:

Background: Urban/ Rural

*I was informed about the study & I voluntarily participate in the research as a subject.*

*Signature:*

Questions:

1. Do you have any hearing related issues? Yes/ No

2. If yes, what? _________________________

3. Does anybody in your family suffer from hearing issues? If yes, please describe the problem. __________________

4. Do you experience sound inside your ears? (tinnitus)

5. Do you have the habit of listening to music at loud volumes?

6. Do you feel that sounds typically tolerable to others seem louder to you?

7. Do you have any general health related issues? Please mention your condition if your answer is 'yes'. __________________

8. Do you have any psychological/ psychiatric issues? Please mention your condition if your answer is 'yes'. __________________

9. Do you feel angry/ irritated upon hearing certain sounds like chewing/ yawning/ typing/ cutlery etc.? Yes/ No *(If your answer is ‘yes’ for the 9th question, please drop your phone number for further research purposes ______________)*

10. What other sounds trigger you?

11. Do you do anything to avoid such triggers? _________________

12. If yes, what? _____________

**Amsterdam Misophonia Scale (A-MISO-S)**

**9.1. How much of your time is occupied by misophonic sounds? (How frequently do the (thoughts about the) misophonic sounds occur?)**

- **None**- 0
- **Mild**, less than 1 hr/day,or occasionally (thoughts about ) sounds (no more than 5 times a day)- 1
- **Moderate**, 1 to 3 hrs/day, or frequent (thoughts about) sounds (no more than 8 times a day, most of the hours are unaffected)- 2
- **Severe**, greater than 3 hrs and up to 8 hrs/day or very frequent (thoughts about) sounds- 3
- **Extreme**, greater than 8 hrs/day or near constant (thoughts about) sounds- 4

**9.2. How much do these misophonic sounds interfere with your social, work or role functioning? (Is there anything that you don’t do because of them? If currently not working determine how much performance would be affected if you were employed.)**

- **None**- 0
- **Mild**, slight interference withi social or occupational/school activities, but overall performance not impaired- 1
- **Moderate**, definite interference with social or occupational performance, but still manageable- 2
- **Severe**, causes substantial impairment in social or occupational performance- 3
- **Extreme**, incapacitating- 4

**9.3. How much distress do the misophonic sounds cause you? (In most cases, distress is equated with irritation, anger, or disgust. Only rate the emotion that seems triggered by misophonic sounds, not generalized irritation or irritation associated with other conditions.)**

- **None**- 0
- **Mild**, occasional irritation/distress- 1
- **Moderate**, disturbing irritation/anger/disgust, but still manageable- 2
- **Severe**, very disturbing irritation/anger/disgust- 3
- **Extreme**, near constant and disturbing anger/disgust- 4

**9.4. How much effort do you make to resist the (thoughts about the) misophonic sounds? (How often do you try to disregard or turn your attention away from these sounds? Only rate effort made to resist, not success or failure in actually controlling the thought or sound.)**

- Makes an effort to always resist, or symptoms so minimal, doesn’t need to actively resist- 0
- Tries to resist most of the time- 1
- Makes some effort to resist- 2
- Yields to all (thoughts about) misophonic sounds without attempting to control them, but does so with some reluctance- 3
- Completely and willing yields to all obsessions- 4

**9.5. How much control do you you have over your thoughts about the misophonic sounds? How successful are you in stopping or diverting your thinking about the misophonic sounds? Can you dismiss them?**

- Complete control- 0
- Much control, usually able to stop or divert thoughts about misophonic sounds- 1
- Moderate control, sometimes able to stop or divert thoughts about misophonic sounds- 2
- Little control, rarely successful in stopping or dismissing thoughts about misophonic sounds, can only divert attention with difficulty- 3
- No control, experience thoughts as completely involuntary, rarely able to alter thinking about misophonic sounds- 4

**9.6. Have you been avoiding doing anything, going any place, or being with anyone because of your misophonia? (How much do you avoid, for example, by using other loud sounds, such as music?)**

- No deliberate avoidance- 0
- **Mild**, minimal avoidance, Less than an hr/day or occasional avoidance- 1
- **Moderate**, some avoidance. 1 to 3 hr/day or frequent avoidance- 2
- **Severe**, much avoidance. Greater than 3 up to 8 hr/day. Very frequent avoidance- 3
- **Extreme**, very extensive avoidance. Greater than 8 hr/day. Doing almost everything you can to avoid triggering symptoms- 4

**9.7. What would be the worst thing that could happen (to you) if you were not able to avoid the misophonic sounds?** ________________

The Amsterdam Misophonia Scale (A-MISO-S), developed in 2013 by Schröder and colleagues, is a tool used to evaluate the severity of misophonia symptoms.

the scale consists of 6 items, each rated on a 0 to 4 scale:

0 = No symptoms.

1 = Mild.

2 = Moderate.

3 = Severe.

4 = Extreme.

The six areas evaluated are:

1. Time spent thinking about misophonia triggers.

2. Interference with daily activities (social or work-related).

3. Distress caused by the sounds.

4. Efforts to resist the urge to respond to the triggers.

5. Degree of control over the reactions.

6. Frequency of triggers.

The total score ranges from 0 to 24, and severity is categorized as follows:

Mild: 0–4.

Moderate: 5–9.

Severe: 10–14.

Extreme: 15–24.

The scale helps in assessing the severity of misophonia and identifying the need for intervention.

**TINNITUS HANDICAP INVENTORY**

1. **Because of your tinnitus, is it difficult for you to concentrate?**

Yes/ Sometimes/ No

1. **Does the loudness of your tinnitus make it difficult for you to hear people?**

Yes/ Sometimes/ No

1. **Does your tinnitus make you angry?**

Yes/ Sometimes/ No

1. **Does your tinnitus make you feel confused?**

Yes/ Sometimes/ No

1. **Because of your tinnitus, do you feel desperate?**

Yes/ Sometimes/ No

1. **Do you complain a great deal about your tinnitus?**

Yes/ Sometimes/ No

1. **Because of your tinnitus, do you have trouble falling to sleep at night?**

Yes/ Sometimes/ No

1. **Do you feel as though you cannot escape your tinnitus?**

Yes/ Sometimes/ No

1. **Does your tinnitus interfere with your ability to enjoy your social activities (such as going out to dinner, to the movies)?**

Yes/ Sometimes/ No

1. **Because of your tinnitus, do you feel frustrated?**

Yes/ Sometimes/ No

1. **Because of your tinnitus, do you feel that you have a terrible disease?**

Yes/ Sometimes/ No

1. **Does your tinnitus make it difficult for you to enjoy life?**

Yes/ Sometimes/ No

1. **Does your tinnitus interfere with your job or household responsibilities?**

Yes/ Sometimes/ No

1. **Because of your tinnitus, do you find that you are often irritable?**

Yes/ Sometimes/ No

1. **Because of your tinnitus, is it difficult for you to read?**

Yes/ Sometimes/ No

1. **Does your tinnitus make you upset?**

Yes/ Sometimes/ No

1. **Do you feel that your tinnitus problem has placed stress on your relationships with members of your family and friends?**

Yes/ Sometimes/ No

1. **Do you find it difficult to focus your attention away from your tinnitus and on other things?**

Yes/ Sometimes/ No

1. **Do you feel that you have no control over your tinnitus?**

Yes/ Sometimes/ No

1. **Because of your tinnitus, do you often feel tired?**

Yes/ Sometimes/ No

1. **Because of your tinnitus, do you feel depressed?**

Yes/ Sometimes/ No

1. **Does your tinnitus make you feel anxious?**

Yes/ Sometimes/ No

1. **Do you feel that you can no longer cope with your tinnitus?**

Yes/ Sometimes/ No

1. **Does your tinnitus get worse when you are under stress?**

Yes/ Sometimes/ No

1. **Does your tinnitus make you feel insecure?**

Yes/ Sometimes/ No

Each ‘yes’ contains a score of 4 marks, ‘sometimes’ contains 2 marks, and ‘no’ is given 0 marks. Maximum total is 100 marks, total is again categorized into different categories which speaks about the severity levels of tinnitus.

| Score | Classification |
| --- | --- |
| 0–16 | No or slight handicap |
| 18–36 | Mild handicap |
| 38–56 | Moderate handicap |
| 58–76 | Severe handicap |
| 78–100 | Catastrophic handicap |
